# Supplementary material for: A prospective, randomized trial of patient-reported outcome measures to drive management decisions in hematology and oncology
Source: PubMed Central journal article supplement — Contemp Clin Trials Commun. 2022 Jul 13;29:100964. doi: 10.1016/j.conctc.2022.100964 (PMC9344350; doi:10.1016/j.conctc.2022.100964), 2022-07-13
Supplement: mmc1.pdf [file mmc1.pdf]

**Hematology and Oncology Physician  
Was It Worth It (WIWI) Questionnaire**

Date of survey: \_\_\_/\_\_\_/\_\_\_  
mm dd yyyy

*We are interested in your opinion concerning your experience with the PROQOL- Hematology and Oncology BEACON. If you are interested in sharing your opinion with the study team, please complete this survey. If you do not wish to respond, you can just disregard this survey.*

---

**Directions:** Please answer each question by checking the appropriate box

1. Do you believe the PROQOL interferes with the care of your patient's?  
 Yes  
 No  
 Unsure
  
2. Would you recommend your patients and/or to others in filling out the PROQOL?  
 Yes  
 No  
 Unsure
  
3. Overall, do believe you may see an improvement in the health of your patient's well-being by receiving additional resources?  
 Yes  
 No  
 Unsure
  
  
4. If there was **one thing** that could have been done to improve your experience with the PROQOL what is it?  

---

---

Thank you for your time, Study Staff.

**Hematology and Oncology PROQOL  
Was It Worth It (WIWI) Questionnaire**

Date of survey: \_\_\_/\_\_\_/\_\_\_  
mm dd yyyy

*We are interested in your opinion concerning your experience with the PROQOL- Hematology and Oncology BEACON. If you are interested in sharing your anonymous opinion with the study team, please complete this survey. If you do not wish to respond, you can just disregard this survey.*

---

**Directions:** Please answer each question by checking the appropriate box

1. Do you find the PROQOL tool was easy to use and complete during your clinical visit?
  - a.  Yes
  - b.  No
  - c.  Unsure
  
2. Did you use the any of the resources that were provided to you?
  - a.  Yes
  - b.  No
  - c.  Unsure
  
3. Do you think that the resources provided were helpful in addressing your main issue?
  - a.  Yes
  - b.  No
  - c.  Unsure
  
4. Did you find that this tool improved your clinical visit?
  - a.  Yes
  - b.  No
  - c.  Unsure
  
5. If there was **one thing** that could have been done to improve your experience with the PROQOL what is it?  

---

---

Thank you for your time, Study Staff.
